# Supplementary material for: Long-term outcomes and predictors of patients with ST elevated versus non-ST elevated myocardial infarctions in non-obstructive coronary arteries: a retrospective study in Northern China
Source: PeerJ. 2023 Mar 3;11:e14958. doi: 10.7717/peerj.14958 (PMC9987296; doi:10.7717/peerj.14958)
Supplement: Supplemental Information 1 [file peerj-11-14958-s001.xls]

## Sheet: Raw data
age	Killipgrade	BNP	cTnT	CKMB	WBC	RBC	HB	PLT	HCT	MCV	RDW	PCT	MPV	PDW	PT	INR	PTA	FBG	AST	ALT	ALB	tc	ldl	hld	LV	EF	aspin	ADP	βblockers	MACE	death	stroke	heartfailure	AMI
68	1	#NULL!	1.87	#NULL!	7.22	5.12	177	218	0.502	98	12.8	0.25	11	13.7	10.6	0.91	112	2.57	55.5	31.3	59.7	3.89	2.55	0.94	50	58	1	1	0	0	0	0	0	0
52	1	12.7	0.17	2	5.97	4.92	150	255	0.441	89.6	12.4	0.26	10	12.1	10.7	0.92	118	3.33	27.1	23.3	39.1	3.78	3.06	0.97	49	60	1	1	0	1	0	0	0	0
53	2	1410	21.3	13.6	7.22	4.58	137	201	0.412	90	12.9	0.23	12	13.5	10.7	0.92	107	3.89	95.4	62.7	35.1	1.22	1.82	0.66	64	37	1	1	1	1	0	0	1	0
50	1	35.1	0.05	1	6.01	4.33	139	243	0.407	94	13.5	0.25	10	11.2	10.9	0.93	109	3.64	16.9	11.4	34.2	0.87	2.14	1.05	#NULL!	#NULL!	1	0	0	1	0	1	0	0
86	1	47.5	0.05	1	5.82	4.33	138	186	0.402	92.8	12.8	0.19	10	12.4	10.5	0.9	110	3.65	39.9	61.4	33.8	1.13	1.56	1.03	48	56	1	1	1	0	0	0	0	0
56	1	28.7	11.3	19.7	6.3	4.43	132	233	0.41	90.5	12.6	0.24	10	11.6	11	0.94	111	2.49	23.4	10.8	36.8	0.99	2.37	1.38	44	58	1	1	0	1	0	1	1	0
55	1	39.6	27	6.7	11.81	4.4	133	283	0.39	88.6	11.9	0.32	11	14.1	12	1.03	92	2.24	86.1	18.4	39.7	0.74	2.16	1.53	47	55	1	1	1	0	0	0	0	0
37	1	377	10.9	31.9	10.28	5.1	159	285	0.475	93.1	13.1	0.29	10	11.1	10.5	0.9	123	1.64	46	67	33.4	2.02	3.04	1.35	54	58	1	1	1	0	0	0	0	0
52	1	76.5	10.2	36.2	4.65	3.26	77	304	0.258	79.1	16.4	0.32	11	12.5	10.9	0.93	102	2.57	26	12	40.5	#NULL!	1.86	#NULL!	48	66	1	1	0	0	0	0	0	0
53	1	8.8	17.8	33.2	11.73	4.47	135	286	0.423	94.6	12.6	0.31	11	13.1	11	0.94	103	3.41	111.2	39.4	37	1.38	4.08	1.55	44	57	1	1	0	0	0	0	0	0
49	1	5	5.11	34.2	20.4	5.78	166	564	0.53	91.7	12.9	0.59	10	12.5	10.7	0.92	112	2.99	164.3	69.6	48.9	3.75	1.73	0.73	#NULL!	#NULL!	1	1	0	0	0	0	0	0
47	1	848	8.87	19	5.77	3.99	120	182	0.351	88	12	0.17	9	9.8	12	1	91	2.84	70	13	32.4	0.62	1.99	1.2	48	66	1	1	0	1	0	0	0	0
45	1	126	0.05	5	10.04	4.67	146	235	0.443	94.9	12.4	0.23	10	11.5	11.1	0.95	110	3.98	60	139.5	34.6	2.17	2.08	0.75	49	60	1	1	0	0	0	0	0	0
48	1	126	38	63.8	8.77	4.89	132	316	0.404	82.6	12.9	0.33	10	12.1	10.9	0.93	108	4.37	109.9	39.8	35.7	2.95	3.16	1.05	44	56	1	1	0	0	0	0	0	0
38	1	96.9	0.17	#NULL!	6.33	4.98	153	212	0.45	90.4	12.4	0.24	11	13.3	12.4	1.06	88	2.17	51.8	144	40.2	1.04	1.81	1.03	45	55	1	1	0	0	0	0	0	0
45	1	144	5.4	4.4	15.8	5.34	158	247	0.46	86.1	13.4	0.3	12	15.7	11.5	0.98	99	3.23	32.4	16.9	36.8	1.64	3.15	1.11	46	60	1	1	0	0	0	0	0	0
47	1	744	34	34.2	14.61	4.59	144	182	0.427	93	13.4	0.21	12	14	9.8	0.84	132	2.48	143	26.1	39.9	5.04	3.55	1.39	52	62	0	1	0	0	0	0	0	0
52	1	11.6	0.56	1	4.61	4.22	132	175	0.39	93.4	12.5	0.19	11	12.3	10.9	0.93	103	2.29	24	18.5	38.9	0.81	2.58	1.36	49	60	1	1	1	0	0	0	0	0
34	1	16.7	1.15	1	7.03	5.34	153	239	0.46	86.7	13.2	0.23	10	11.6	11.1	0.95	98	3.31	150	407.6	40.7	1.93	2.63	0.99	48	60	1	1	0	0	0	0	0	0
60	1	62.6	12.4	35.6	5.55	4.24	146	148	0.426	100.5	13.6	0.14	10	9.8	11.1	0.95	101	2.33	105	65.7	40.9	2.59	1.6	1.78	46	57	1	1	0	1	0	0	1	0
40	1	661	9.68	16.6	12.13	495	153	234	0.476	96.2	13.3	0.26	11	14	11.5	0.98	97	6.2	81.5	69.5	36.6	2.82	2.42	0.85	55	57	1	1	0	0	0	0	0	0
48	1	2670	0.35	1.15	11.41	4.24	136	386	0.398	93.9	13.4	0.38	10	11	10.5	0.9	112	2.87	25	44	36.9	1.43	2.03	0.88	54	60	1	1	1	0	0	0	0	0
65	1	5	44	80	16.95	4.48	141	349	0.424	94.6	13.7	0.35	10	11.8	12.4	1.06	86	1.38	171	30.7	42.3	1.45	2.96	1.57	48	50	1	1	1	0	0	0	0	0
53	1	26.9	4.85	17.5	7.22	4.71	151	168	0.439	93.2	13.3	0.2	12	15.3	10.6	0.91	109	2.44	47	25	45	3.7	3.08	1.33	45	65	1	1	1	0	0	0	0	0
43	1	751	0.29	1.73	7.5	5.91	166	265	0.5	84.6	12.6	0.28	11	11.8	10.4	0.89	115	3.07	27	52	40.8	2.05	2.76	1.04	54	44	1	1	1	0	0	0	0	0
50	1	93.8	0.05	1	4.62	4.36	137	324	0.411	94.3	12	0.34	10	12.1	11.7	1	93	2.93	31.5	52.7	35.6	0.79	1.91	1.22	48	63	1	1	0	1	0	0	1	0
42	1	5	0.05	1	5.16	5.38	155	150	0.438	81.4	12.6	0.15	10	13.2	9.9	0.85	131	2.22	32.6	35.3	41.3	2.34	2.19	1.03	45	60	1	1	1	0	0	0	0	0
79	1	2150	1.64	7.18	8.57	4.52	140	381	0.399	88.3	12.7	0.36	9	10.4	10.4	0.89	115	3.67	29	25	48.5	1.11	3.7	1.66	49	46	1	1	0	0	0	0	0	0
50	1	133	0.15	1.26	9.91	4.61	142	443	0.435	93.1	14.6	0.46	11	12.3	#NULL!	#NULL!	#NULL!	#NULL!	26	35	40.2	1.13	1.69	1.22	#NULL!	#NULL!	1	1	0	0	0	0	0	0
65	1	32.6	0.25	1	8.27	4.83	146	207	0.418	86.5	13.3	0.21	10	11.2	10.7	0.91	110	3.77	22.1	9.2	45.2	1.29	1.37	1.41	51	66	1	1	1	1	0	1	1	0
47	1	#NULL!	3.77	12.2	6.93	4.99	155	256	0.447	89.6	12.7	0.26	10	11.7	11	0.94	105	3.32	33.5	36.1	47.6	3.26	3.01	0.99	43	57	1	1	1	0	0	0	0	0
61	1	16	0.05	1	5.96	4.95	150	229	0.429	86.7	13.6	0.21	9	10.4	10.1	0.87	125	2.99	24.4	9.2	32.4	1.55	2.62	1.28	53	62	1	1	0	0	0	0	0	0
65	1	14.2	0.05	1	7.54	4.98	157	269	0.457	91.8	11.9	0.25	9	10.1	11.5	0.98	99	3.17	25.3	10.4	39.6	1.03	2.03	1.44	48	55	1	1	0	0	0	0	0	0
48	1	4820	0.033	0.81	7.81	4.15	133	370	0.402	96.9	13.7	0.37	10	11.2	9.6	0.82	140	2.8	26.1	11.3	35.3	1.22	1.92	2.04	58	42	1	1	1	1	0	0	1	0
65	1	112	0.041	#NULL!	8.97	4.9	149	325	0.46	94.7	16.1	0.28	9	8.6	11	0.94	105	3.25	213	170	33.2	1.48	3.37	1.39	49	57	1	1	1	0	0	0	0	0
44	2	177	119	80	15.21	3.64	127	398	0.368	101	13	0.43	10.7	12	11.7	1	97	3.43	271	69.1	36	1.21	2.14	1.21	49	57	1	1	1	0	0	0	0	0
57	1	2940	2.45	18.5	7.11	4.19	121	177	0.376	89.7	13.1	0.19	11	12.8	14.1	1.2	76	1.95	19	11	39.8	0.92	1.85	1.67	50	57	1	0	0	0	0	0	0	0
44	1	25.8	0.05	1	5.95	4.66	148	219	0.46	98.7	13.1	0.23	11	12.5	10.6	0.91	116	3.13	199.1	395.9	39.5	1.03	1.41	1.05	48	63	1	1	1	0	0	0	0	0
60	1	#NULL!	30	53.4	13.89	4.61	133	240	0.396	85.9	13	0.28	12	15	11.5	0.98	98	2.87	238	73.6	43.2	0.95	2.34	1.23	55	45	1	1	1	0	0	0	0	0
65	1	5	0.05	2	22	4.26	139	186	0.406	95.3	12.9	0.2	11	11.9	11.9	1.02	94	2.67	38.8	15.2	27.4	0.75	1.18	1.45	44	60	1	1	0	1	0	0	0	0
51	1	74.5	4.2	8.3	9.43	4.69	133	210	0.412	87.8	13.2	0.21	10.1	11.9	11.9	1.02	94	2.77	41.1	21.3	32.6	1.06	1.21	1.01	50	57	1	1	1	0	0	0	0	0
48	1	189	2.42	11.1	8.74	5.87	173	264	0.505	86	13.3	0.29	11	12.8	11.7	1	95	4.43	33.2	24.6	47	1.63	2.49	1.23	45	52	1	1	1	0	0	0	0	0
59	1	5	63	70.3	6.77	4.66	145	219	0.42	90.3	13.4	0.23	11	13.2	10.1	0.86	131	3.59	79.2	31.1	37.2	1.24	2.29	1.01	48	57	1	1	0	1	0	0	0	0
47	1	42.1	0.05	1.2	6.77	4.89	146	234	0.43	87.9	12.2	0.25	11	13	11	0.94	110	2.83	35.4	88.5	39.5	3.99	2.85	1.09	45	60	1	1	1	0	0	0	0	0
59	1	30	5.41	39.4	7.51	5.56	169	199	0.48	86.3	12.3	0.22	11	12.1	10.8	0.92	111	3.19	67.9	22.3	39.3	1.2	3.52	1.05	48	60	1	1	0	0	0	0	0	0
35	1	37.2	0.646	3.01	5.89	4.63	133	84	0.374	83.1	14.6	0.09	10	12.4	11.4	0.97	96	2.84	61.5	93.6	38.5	0.95	2.51	1.5	48	60	1	1	1	0	0	0	0	0
48	1	#NULL!	#NULL!	#NULL!	#NULL!	#NULL!	#NULL!	#NULL!	#NULL!	#NULL!	#NULL!	#NULL!	#NULL!	#NULL!	#NULL!	#NULL!	#NULL!	#NULL!	#NULL!	#NULL!	#NULL!	#NULL!	#NULL!	#NULL!	#NULL!	#NULL!	#NULL!	#NULL!	#NULL!	0	0	0	0	0
59	1	18.1	3.7	6.3	10.36	4.65	144	266	0.431	92.7	13.7	0.26	10	10.1	10.4	0.89	112	4.48	36.7	12.9	42.8	1.44	2.82	1.98	55	53	1	1	0	1	0	0	0	1
50	1	46.5	0.23	3.5	4.29	3.44	95	88	0.269	85.7	13.2	0.109	12	16.7	11.4	0.96	98	1.25	69	55	25.4	3.03	1.21	0.39	66	40	1	1	0	1	0	0	1	0
54	1	193	7.32	26.6	6.93	3.55	112	149	0.338	95.2	14	0.15	10	11.4	10.7	0.92	107	2.04	56.8	16.6	33.8	0.8	2.8	2.32	42	51	0	0	0	0	0	0	0	0
58	1	166	24.2	46.7	4.55	4.95	148	182	0.437	88.3	12.7	0.18	10	10	10.2	0.88	126	2.78	106.9	37.7	34.8	0.78	1.77	1.92	54	59	1	1	1	0	0	0	0	0
62	1	194	0.012	1.18	4.34	3.98	128	166	0.38	95.5	12.3	0.17	10	11.5	11.1	0.95	109	2.69	22.6	12.9	35.6	0.81	3.14	1.88	44	62	1	1	1	0	0	0	0	0
34	1	65.9	9.17	48	#NULL!	#NULL!	#NULL!	#NULL!	#NULL!	#NULL!	#NULL!	#NULL!	#NULL!	#NULL!	10.4	0.89	113	2.69	61.5	54.3	44.5	1.77	1.87	1.16	45	60	1	1	1	0	0	0	0	0
55	1	5	2.02	61.7	12.38	5.27	162	506	0.48	91.1	13.6	0.5	10	11.5	12.2	1.04	87	6.7	169	33.9	45.2	1.26	2.7	1.37	46	57	1	1	1	0	0	0	0	0
44	1	41	1.73	28	22.59	5.63	174	241	0.509	90.4	13.6	0.28	11	14	10.7	0.91	104	2.86	381	67.4	44.7	8.03	2.58	1.18	49	50	1	1	0	0	0	0	0	0
54	1	5	10.6	36.1	11.65	4.96	162	190	0.49	98.8	13.3	0.21	11	13.3	11.2	0.96	100	2.64	78.1	28.9	36.8	1.74	2.65	1.17	47	57	1	1	0	1	0	0	0	1
55	1	21.4	30	74.7	#NULL!	#NULL!	#NULL!	#NULL!	#NULL!	#NULL!	#NULL!	#NULL!	#NULL!	#NULL!	10.4	0.89	112	3.24	112	34.1	38.4	6	2.48	1.26	49	55	1	1	0	0	0	0	0	0
71	1	344	24.2	1	5.93	4.14	125	201	0.384	92.8	13.3	0.22	11	13.3	11.8	1.01	99	2.55	49	17	41.1	0.66	1.75	1.2	43	54	1	1	0	1	0	0	1	0
78	1	2030	0.56	1.77	#NULL!	#NULL!	#NULL!	#NULL!	#NULL!	#NULL!	#NULL!	#NULL!	#NULL!	#NULL!	10.5	0.9	102	3.22	34	32	34.4	3.96	2.53	1.06	#NULL!	#NULL!	1	0	0	0	0	0	0	0
76	1	1150	0.024	0.097	6.31	4.44	134	212	0.43	96.8	13.1	0.22	11	12.3	11.3	0.97	96	2.8	31.5	56.6	34.7	1.01	2.05	1.55	47	57	1	1	1	0	0	0	0	0
64	1	257	3.46	5.59	5.19	5.05	154	85	0.442	87.5	12.6	0.1	13	22.1	11.5	0.98	103	2.74	20	23	36.3	1.72	2.92	0.91	48	64	1	1	0	0	0	0	0	0
36	1	20.4	5.42	37.5	9.07	6.08	175	250	0.513	84.4	12.9	0.26	11	13.4	10.5	0.9	110	3.28	109	85.9	40.2	2.93	4.06	0.97	52	56	1	1	0	0	0	0	0	0
66	1	270	15.5	63	8.3	4.24	132	209	0.4	94.3	12.9	0.24	11	12.7	10.5	0.9	119	2.07	157	16	33.7	1.08	2.06	1.53	49	58	1	1	0	0	0	0	0	0
22	1	156	81	80	9.21	4.97	149	219	0.427	85.9	12.1	0.24	11	12.9	13.8	1.18	78	5.9	198	59.8	37	1.11	1.48	0.87	51	58	1	1	0	0	0	0	0	0
73	2	39.6	0.05	2.5	16.83	4.09	124	245	0.365	94.3	12.6	0.22	10	11.6	10.8	0.92	109	2.41	36.3	28.1	39.1	1.6	2.36	1.29	44	67	1	0	0	1	1	0	0	0
47	1	66.3	0.06	1	7.45	4.71	173	180	0.518	110	13.7	0.19	11	12.7	13.3	1.13	78	4.31	45.1	68.9	45	1.48	2.01	0.75	48	60	1	1	1	0	0	0	0	0
58	1	307	0.42	1	6.82	4.74	139	284	0.413	87.1	12	0.33	12	14.2	10.8	0.92	105	3.77	26.6	92.8	39.9	3.2	2.98	0.85	55	60	1	1	0	0	0	0	0	0
37	1	126	0.05	1.1	7.77	4.79	152	184	0.444	92.7	12.4	0.21	12	14.4	11.5	0.98	96	4.37	29.1	58	41.8	1.02	1.55	0.88	48	67	1	1	1	0	0	0	0	0
34	1	131	2.43	1.9	3.64	4.32	114	185	0.357	82.6	13.5	0.18	10	10.5	12.6	1.08	82	4.15	33	16.4	31.6	1.06	1.92	0.71	46	62	1	1	1	0	0	0	0	0
49	1	253	32.9	5.5	11.05	#NULL!	#NULL!	353	0.36	#NULL!	#NULL!	#NULL!	#NULL!	#NULL!	10.5	0.9	111	3.1	157.3	84.1	42.1	2.41	3.54	1.7	46	58	1	1	1	0	0	0	0	0
45	1	5	12.9	1.9	17.13	5.41	167	326	0.509	94.1	12.8	0.32	10	11.2	10.7	0.91	108	2.54	73.9	32	40.7	4	3.82	0.95	49	70	1	1	0	0	0	0	0	0
48	1	108	0.248	1.67	6.32	4.8	154	427	0.451	94	13.1	0.4	9	10.2	10.8	0.92	109	4.14	34.9	43.3	38.9	1.45	1.75	0.75	54	54	1	1	1	0	0	0	0	0
78	2	762	3.29	27.5	10.15	3.17	97	150	0.292	92.1	13.7	0.13	9	8.8	11.6	0.99	94	8.1	42	72.4	25.9	0.61	1.95	1.56	44	52	1	1	0	1	0	0	1	0
54	1	120	0.46	4	11.83	4.43	135	221	0.385	86.9	12.4	0.28	13	17	12	1.03	96	3.37	27.8	14.6	39.6	1.22	1.46	0.63	50	59	1	1	0	1	1	0	0	0
39	1	382	0.184	0.95	5.33	5.62	165	188	0.483	85.9	12.5	0.17	9	10.1	11.5	0.98	99	2.92	21.9	36.4	48.1	1.66	2.29	0.73	48	55	1	1	1	0	0	0	0	0
75	2	1580	30	55.8	16.4	4.33	137	75	0.42	97	14	0.08	11	11.5	13.9	1.18	76	3.64	1227	492	34.6	1.62	1.54	0.78	52	47	1	1	1	1	1	0	0	0
51	2	6720	15.3	4.33	12.42	4.56	149	229	0.42	93	12.8	0.23	10	11.2	10.5	0.9	112	6.7	46	99	34.3	4.93	3.87	1.04	50	58	1	1	1	1	0	0	1	0
60	1	150	11.6	2.32	9.58	4.24	147	219	0.43	102	12.5	0.23	11	11.6	12	1.03	82	1.2	125	22	37.7	1.27	2.14	1.33	48	55	1	1	0	0	0	0	0	0
51	2	6260	2.49	0.68	5.72	3.79	112	64	0.335	88.4	12.9	0.08	13	18.9	14	1.2	72	1.69	42.3	60.8	35.7	1.44	3.31	0.8	53	58	1	1	1	1	1	0	0	0
73	2	47.7	0.05	1	10.12	4.42	139	276	0.48	92.3	12	0.27	10	10.8	10.4	0.89	116	2.74	23.8	30.4	43.6	1.68	2.43	1.27	50	60	1	1	0	1	0	1	1	0
44	1	500	4.05	0.98	9.98	4.81	139	212	0.419	87.1	12.7	0.23	11	12.6	12	1.03	89	6.4	#NULL!	#NULL!	#NULL!	#NULL!	#NULL!	#NULL!	48	60	1	1	0	0	0	0	0	0
48	1	180	0.05	1	4.56	3.88	124	264	0.37	95.4	12.7	0.31	12	14.7	10.7	0.9	116	3.3	29.5	48.7	38.4	3.03	2.23	0.74	54	45	1	1	1	0	0	0	0	0
5	1	335	0.069	0.59	8.99	4.97	154	359	0.46	92.8	14.1	0.39	11	13.1	11.4	0.97	100	2.78	23.2	24.1	42.2	2.33	2.95	1.12	50	60	1	1	0	1	0	0	0	1
63	1	13	29.7	27.9	8.99	4.45	130	183	0.415	93.3	12.8	0.2	11	12.4	11.7	1	94	2.72	83.2	22.1	38.7	1.02	2.28	1.8	47	57	1	1	0	0	0	0	0	0
60	1	112	0.05	1	6.05	5.53	172	153	0.515	93.1	13.5	0.18	12	16.9	9.7	0.83	134	3.16	16.5	15	35.6	1.22	3.02	1.2	55	60	1	1	0	0	0	0	0	0
79	2	417	2.7	8.3	5.36	3.02	107	66	0.299	99	12.9	0.07	11	13.3	13.5	1.16	74	3.02	36.2	12.2	33.9	0.51	2.38	1.6	45	48	1	1	0	0	0	0	0	0
49	1	43.3	2.58	4.6	4.16	4.25	135	167	0.382	89.9	12.4	0.16	10	10.3	10.3	0.88	123	1.96	52.3	28.9	37.2	2.84	2.83	1.49	48	48	1	1	0	0	0	0	0	0
45	1	190	290	74.3	13.76	3.56	95	317	0.303	85.1	17.6	0.3	9	9.5	10.5	0.9	121	2.62	634	128	35.4	1.24	2.51	1.22	53	35	1	1	0	0	0	0	0	0
42	1	5	6.8	7.6	9.4	5.5	174	246	0.481	87.5	13.4	0.27	11	13.4	11.3	0.97	100	2.76	40.3	36.3	45.8	5.93	2.47	0.91	51	52	1	1	1	0	0	0	0	0
27	1	30.2	4.14	39.4	18.28	4.1	138	258	0.39	96.1	12.7	0.26	10	11.2	10.5	0.9	116	2.67	80.5	30.2	37.7	0.9	3.01	1.17	46	58	1	1	1	0	0	0	0	0
61	1	#NULL!	36	65.1	6.94	4.82	163	196	0.495	102.7	14.8	0.19	10	10.5	15.6	1.33	60	0.37	175.5	33.4	31.3	2.22	2.44	1.74	46	51	1	1	0	1	1	0	0	1
51	1	5	0.2	3.7	6.69	4.97	157	125	0.463	93.2	13.3	0.15	12	13.7	11	0.94	111	3.32	38.5	22.5	36.4	4.14	2.06	1.14	53	57	1	1	0	0	0	0	0	0
50	1	81.6	18.4	29	6.83	4.52	138	127	0.419	92.7	13.1	0.13	10	11.1	11.2	0.96	96	2.52	38	26	39.8	1.57	3.25	1.56	50	55	1	1	0	0	0	0	0	0
66	1	20900	0.923	1.94	9.83	2.82	84	226	0.269	95.4	14.3	0.2	9	8.7	11.1	0.95	110	7.3	14.1	4.8	28.9	1.67	2.06	0.81	50	59	1	1	1	0	0	0	0	0
42	1	114	0.046	0.85	5.8	4.8	154	201	0.455	93.2	13.4	0.2	10	10.8	11.9	1.02	93	3.07	51.2	75.2	42.1	1.33	3.07	1.11	45	66	1	1	1	0	0	0	0	0
56	1	23.5	3.58	31.9	8.36	5.22	167	283	0.479	91.8	12.6	0.32	12	14.5	10.9	0.93	109	3.07	46.9	22.1	43	2.41	3.13	1.09	47	57	1	1	1	0	0	0	0	0
41	1	31.7	7.54	13.5	10.44	5.54	167	254	0.487	87.9	12.7	0.26	10	11.9	10.6	0.91	120	3.97	47.2	32.1	40.9	1.16	2.34	1.36	51	60	1	1	1	0	0	0	0	0
43	1	5.4	23.5	39.8	9.88	4.5	146	253	0.418	92.9	13	0.24	9	10.4	10.4	0.89	123	2.32	75.8	34.4	37.3	5.39	2.82	1.08	52	60	1	1	1	0	0	0	0	0
68	1	179	2.81	10.9	8.4	4.49	134	264	0.402	89.5	12.5	0.3	12	14.8	10.9	0.93	109	3.73	34.7	12.4	39	1.36	2.56	1.61	49	60	1	1	0	1	0	0	1	0
52	1	225	5.1	15.7	4.22	4.04	123	195	0.38	96	13.1	0.23	12	13.6	11.6	0.99	94	3.11	71.3	68.8	36.2	3.4	2.28	0.61	47	51	1	1	1	0	0	0	0	0
62	1	5	46.7	50.7	7.95	4.32	149	163	0.419	97	12.8	0.18	11	13.3	10.3	0.89	120	2.9	151.7	38.6	43	2.04	2.77	1.45	46	56	1	1	0	0	0	0	0	0
63	1	#NULL!	2.67	2.69	6.56	4.8	144	208	0.426	88.8	13.3	0.22	11	12	11.3	0.97	98	2.78	40.1	37.1	37	1.17	2.32	1.02	49	60	1	1	0	0	0	0	0	0
68	1	27.8	31.8	66.9	5.91	4.6	142	175	0.426	92.6	13	0.18	11	11.6	11	0.94	106	3.39	77.5	19.2	36	0.95	1.98	1.52	48	52	1	1	0	0	0	0	0	0
38	1	125	3.22	1.3	8.55	4.27	136	571	0.398	93.2	14.4	0.53	9	10.2	10.7	0.92	106	4.71	46.9	77	38.1	1.84	2.21	0.83	51	54	1	1	1	0	0	0	0	0
44	1	#NULL!	397	#NULL!	13.67	4.58	139	250	0.41	89.5	13.3	0.27	11	13	10.7	0.92	117	1.98	658	98.7	44.3	2.37	4.11	1.06	54	52	1	1	1	0	0	0	0	0
67	2	939	8.7	10.3	9.92	3.86	119	132	0.354	91.7	13.1	0.15	12	15.3	16.5	1.39	61	2.84	484	1137	31	0.74	2.03	1.25	55	47	1	1	0	0	0	0	0	0
44	1	104	24	15	15.67	4.21	135	222	0.399	94.8	13.7	0.24	11	12.6	11.2	0.96	108	2.83	109.2	59	34.3	1.35	1.33	0.97	46	62	1	0	0	0	0	0	0	0
60	2	760	0.069	0.97	6.72	4.5	125	167	0.39	91.6	13.7	0.22	10	10.1	11.6	0.99	101	3.36	27.4	64.5	41	1.75	3.32	1.21	60	41	1	1	1	0	0	0	0	0
56	1	5	0.07	1	8.61	4.94	157	178	0.455	92.1	12.5	0.19	11	12.1	10.6	0.91	119	2.01	28.1	27.1	41.2	2.49	2.74	1.52	49	57	1	1	0	0	0	0	0	0
57	1	213	1.1	1	7.25	4.57	153	307	0.447	97.8	13.3	0.32	10	12.2	11.7	1	100	3.98	28.3	40.4	35	#NULL!	#NULL!	#NULL!	#NULL!	#NULL!	1	1	1	0	0	0	0	0
61	1	3820	1.32	9.22	8.2	4.56	135	206	0.49	89.7	12	0.22	11	12.2	10.7	0.92	118	2.65	35	17	35.5	0.78	2.74	1.04	49	51	1	1	1	1	0	1	0	0
68	1	121	0.074	1	#NULL!	#NULL!	#NULL!	#NULL!	#NULL!	#NULL!	#NULL!	#NULL!	#NULL!	#NULL!	10.7	0.91	108	2.54	26.4	30.6	34	1.3	2.91	2	44	70	1	1	0	1	0	0	1	0
45	1	13.5	1.81	1.1	9.24	4.7	146	338	0.431	91.7	13.4	0.36	11	11.7	11.5	0.98	99	2.28	23.6	14.4	38.7	1.13	2.58	1.46	53	60	1	1	0	0	0	0	0	0
37	1	184	18.5	52.9	10.63	4.69	155	52	0.44	93.8	13.3	0.07	13	16.2	12.5	1.07	88	3.89	115.6	67.8	35.1	1.75	2.5	1.08	53	57	1	1	1	0	0	0	0	0
50	2	463	62	80	20.22	5.58	168	222	0.493	88.4	12.7	0.24	11	13.2	12.4	1.06	86	1	144.2	49.9	37.8	1.54	2.95	1.75	53	50	1	1	1	1	0	0	1	0
62	2	1400	0.498	8.17	5.53	4.91	152	156	0.457	93.1	13.6	0.18	11	12.7	#NULL!	#NULL!	#NULL!	#NULL!	21.7	20.1	38.9	2.21	3.44	1.2	55	43	1	1	1	1	0	0	1	1
57	1	263	0.835	#NULL!	6.71	4.89	152	328	0.436	89.2	12.4	0.34	10	12	10.9	0.93	107	3.22	71	113	39	2.58	2.31	0.96	54	54	1	1	1	0	0	0	0	0
65	2	13.4	0.05	1	7.97	3.9	121	230	0.366	93.8	12.3	0.21	9	10	11	0.94	102	3.91	23	21	38.7	0.96	2.21	1.28	53	60	0	0	0	0	0	0	0	0
47	1	19.7	0.05	1	10.99	4.95	160	255	0.48	97	12.9	0.26	10	12	10.8	0.92	106	1.85	16.7	14.8	36.5	2.15	2.28	1.38	#NULL!	#NULL!	1	1	1	0	0	0	0	0
61	2	52.8	0.06	1	8.14	4.52	150	255	0.453	100.2	12.9	0.27	11	12.3	10.5	0.9	111	2.71	#NULL!	#NULL!	#NULL!	#NULL!	#NULL!	#NULL!	#NULL!	#NULL!	1	0	1	0	0	0	0	0
56	1	#NULL!	0.05	1	5.21	4.84	135	244	0.423	87.4	12.3	244	11	12.9	10.2	0.87	116	3.27	18.4	16.7	39.9	1.39	2.32	1.15	50	60	1	1	0	0	0	0	0	0
57	2	#NULL!	0.042	#NULL!	7.21	4.53	136	205	0.41	90.5	12.7	0.21	11	12	10.4	0.89	116	3.97	21.7	28	37.6	1.92	4.18	1.19	#NULL!	#NULL!	1	1	0	0	0	0	0	0
69	2	184	0.012	0.84	6.87	4.56	138	172	0.42	92.1	12.8	0.2	12	14.9	9.7	0.83	137	2.55	25.5	27.7	43.8	0.89	2.37	2.02	48	53	1	1	0	0	0	0	0	0
64	2	#NULL!	0.042	11.8	8.42	4.58	150	105	0.448	97.8	13.7	0.13	12	14.1	10.5	0.9	121	2.95	13.4	13	42.3	0.7	1.26	1.76	55	62	1	1	0	0	0	0	0	0
53	1	#NULL!	0.052	0.82	6.1	4.72	152	190	0.425	90	13	0.22	12	15.7	10.3	0.88	120	2.42	25.2	38.9	42.6	2.34	2.08	1.03	46	55	1	1	1	0	0	0	0	0
62	2	20.4	0.055	1	5.89	4.95	157	171	0.457	92.3	13.4	0.2	12	15	10.3	0.89	120	3.18	34.3	17.6	42.2	0.86	3.15	1.87	52	64	1	1	0	0	0	0	0	0
47	1	61.9	1.47	18.2	7.34	4.67	152	152	0.446	95.5	12.6	0.16	10	12.2	10.4	0.89	112	3.55	51.2	23	37	1.43	1.87	1.42	50	60	1	1	0	0	0	0	0	0
69	1	#NULL!	0.06	14	6.01	3.72	122	181	0.375	100.8	14.3	0.2	11	13	10.4	0.89	116	3.34	17.1	24.4	34.4	1.31	2.85	1.72	50	38	0	1	0	1	0	0	1	0
43	1	40.5	0.057	0.97	3.94	4.69	155	215	0.447	95.3	12.3	0.22	10	12	11.7	1	97	2.3	26.3	19.1	41	1.68	2.88	1.15	51	62	1	1	1	0	0	0	0	0
59	1	39.8	12.8	35.3	12.48	4.45	137	342	0.38	87.4	12.6	0.35	10	11.9	10.7	0.92	112	2.92	43.8	29.1	47	5.94	3.12	0.89	53	55	1	1	0	0	0	0	0	0
63	2	#NULL!	0.21	20	4.45	4.4	134	165	0.47	92.5	12.7	0.18	11	13.2	11.3	0.97	100	2.01	31.9	53.9	36.1	1.09	1.71	0.72	55	65	1	1	0	0	0	0	0	0
55	1	6.6	19.5	66.7	11.17	4.61	145	316	0.428	92.8	12.6	0.35	11	12.6	10.9	0.93	108	2.84	141.1	55.9	46	3.76	5.01	2.08	52	59	1	1	1	0	0	0	0	0
38	1	#NULL!	2.2	1.6	9.4	5.57	173	218	0.499	89.6	13.1	0.27	12	16.8	11.5	0.98	96	2.2	34.4	49.5	40.9	2.61	2.09	0.85	51	59	1	1	0	0	0	0	0	0
43	1	10.4	2.5	1	7.4	4.87	158	0.24	0.46	94.9	12.7	0.24	10	11.8	9.9	0.85	122	2.4	44.5	61.7	44.2	3.03	4.09	1.82	48	55	1	1	1	0	0	0	0	0
54	1	266	1.24	7.9	5	4.47	132	173	0.394	88.1	12.2	0.18	10	12.3	11.5	0.98	96	3.03	40.2	35.5	38.7	0.8	2.36	1.28	46	60	1	1	0	0	0	0	0	0
75	2	23.5	1.5	3.5	8.31	4.72	148	247	0.443	93.9	15.1	0.26	11	11.8	11.3	0.97	102	2.98	38.6	17.2	41.1	1.33	2.81	1.73	51	52	0	1	0	1	0	1	0	0
62	2	581	11.9	2.3	14.67	4.23	137	270	0.407	96.2	13.2	0.28	10	12	11.1	0.95	100	2.23	82.4	28.9	35.8	1.97	2.21	1.33	45	59	1	1	1	0	0	0	0	0
49	1	#NULL!	30.9	58.6	12.85	4.67	160	202	0.447	95.7	12.6	0.23	11	13.6	9.6	0.82	135	2.1	103	54.5	41.4	2.62	3.05	1.32	50	60	1	1	1	0	0	0	0	0
36	1	8.8	1.8	3.8	7.05	4.99	155	178	0.453	90.8	13.5	0.21	12	14.5	10.3	0.88	114	2.41	38.6	40.5	42.6	5.08	2.87	0.82	48	61	1	1	1	0	0	0	0	0
64	2	8	3.47	23	6.87	4.33	145	155	0.405	93.5	12.6	0.17	10.9	12.2	10.6	0.91	114	2.09	34.2	13.5	38.8	1.51	1.95	1.76	52	58	1	1	0	0	0	0	0	0
65	1	69.4	8.12	6.1	13.12	5.18	155	268	0.456	88.2	12.7	0.26	10	10.6	9.9	0.85	122	2.78	58.8	25.4	34.9	1.97	4.73	1.5	48	55	1	1	0	0	0	0	0	0
65	1	31.4	0.37	0.34	4.78	4.45	140	181	0.403	90.6	12.4	0.18	10	10.5	11.1	0.95	104	1.98	13.8	11.1	42.2	1.41	1.72	1.17	47	59	1	1	0	1	0	0	1	0
48	1	52.9	0.4	1	8.44	4.61	150	267	0.425	92.2	12.1	0.3	11	14.9	10.5	0.9	110	2.91	23.3	31.4	35.5	4.25	2.3	1.05	45	59	1	1	1	0	0	0	0	0
63	1	87	0.37	4.08	8.76	5.04	147	389	0.445	88.3	14.3	0.4	10	11.3	10.9	0.93	109	4.12	41.8	63.5	41.8	1.56	3.59	1.24	44	64	1	1	0	1	0	0	1	0
76	2	1700	1.67	1	7.72	4.22	133	252	0.402	95.3	14.4	0.229	12	14.7	11	0.94	108	4.02	25.9	20.9	41.9	0.92	4.65	1.68	50	45	1	0	1	0	0	0	0	0
76	2	79.9	0.21	1.12	4.35	4.08	125	230	0.382	93.6	13.4	0.26	11	13.6	10.1	0.86	123	2.79	27.8	33.7	43.1	1.73	4.23	1.33	52	51	1	1	0	1	0	1	1	0
81	2	455	10	19.3	9.89	4.77	164	163	0.439	92	12.9	0.17	10	11	12.7	1.09	81	2.83	49.8	16.3	35.2	1.44	2.28	1.08	50	52	1	1	1	0	0	0	0	0
57	2	288	10	5.3	#NULL!	#NULL!	#NULL!	#NULL!	#NULL!	#NULL!	#NULL!	#NULL!	#NULL!	#NULL!	12.7	1.09	82	3.49	150	61	35	1.5	2.3	1.2	48	52	1	1	1	0	0	0	0	0
52	1	193	3.57	12.4	5.06	4.4	132	165	0.388	88	13	0.16	10	10.8	10.9	0.93	114	4.03	35.4	36.1	40.9	1.63	2.59	0.79	56	55	1	1	1	0	0	0	0	0
70	1	64	0.12	1.59	7.63	4.07	134	231	0.395	97	12.9	0.24	10	11.2	10.9	0.93	107	3.03	20.5	11.4	37.6	1.15	3.04	0.91	43	60	1	1	1	0	0	0	0	0
61	1	27.5	0.7	1	6.74	4.73	147	195	0.45	96	13.4	0.23	12	14.6	10.9	0.93	104	2.72	31.3	37.6	37	5.07	2.69	0.94	46	66	1	1	1	0	0	0	0	0
72	1	67	6.4	8.6	5.98	3.7	116	199	0.343	92.5	13	0.18	9	9.6	11.3	0.97	102	3.19	39.9	17.4	29.4	0.57	1.76	1.34	51	59	1	1	0	0	0	0	0	0
39	1	85	57	80	6.47	4.12	125	167	0.34	82.5	13.1	0.18	11	12.7	11.6	0.99	98	3.93	254	28.9	36.7	1.27	2.07	0.78	52	58	1	1	0	0	0	0	0	0
45	1	5	0.24	1	5.96	5.2	171	240	0.498	95.8	12.6	0.26	11	12.9	10	0.85	120	2.86	23.4	33.8	44.2	1.24	2.99	1.57	52	56	1	1	1	0	0	0	0	0
62	2	65.4	0.4	1	12.55	3.55	104	177	0.32	90.1	13.2	0.21	12	14.8	12.2	1.04	93	3.41	13.5	13.1	33.9	0.85	0.92	1.06	44	60	1	0	0	0	0	0	0	0
75	1	117	0.23	1.4	3.9	3.62	107	124	0.332	91.7	12.9	0.14	11	12.2	11.3	0.97	100	3.02	22.3	14.8	37.3	1.11	3.17	1.22	50	58	1	1	0	0	0	0	0	0
27	1	6.2	0.88	2.1	12.28	5.56	164	269	0.476	85.6	12.8	0.28	10	12.7	10.3	0.88	114	3.28	22.8	51.1	41.5	2.88	3.79	1.15	55	61	1	1	1	0	0	0	0	0
54	1	29.3	0.49	3.2	7.34	4.54	133	296	0.413	91	13.5	0.31	10	11.4	10.2	0.87	116	3.18	27.6	24.8	39.3	5.71	4.34	1.08	49	60	0	1	1	0	0	0	0	0
66	1	94	0.134	1	5.61	4.89	145	227	0.439	89.8	12.7	0.27	12	15.2	10.3	0.88	114	3.35	15.8	12.7	35.9	1.39	1.99	1.15	50	60	1	1	1	1	0	1	0	0
41	1	15.5	5.34	17.8	6.8	3.9	122	200	0.41	90.2	12.8	0.25	11	12.2	11.5	0.98	98	3.31	79	34.3	43.1	2.39	3.91	1.17	50	65	1	1	1	1	0	0	0	0
52	1	52.7	1.34	6.7	9.28	4.34	143	191	0.418	96.3	12.6	0.19	10	11.3	9.8	0.84	130	2.24	68.1	53.7	38.3	5.28	2.29	0.97	48	60	1	1	0	0	0	0	0	0
81	1	17.8	0.5	1	6.01	4.7	135	178	0.411	87.4	13.1	0.18	10	11.6	11	0.94	105	2.81	17.3	18.4	37.6	0.88	1.24	1.08	48	52	0	1	1	0	0	0	0	0
54	1	7.1	0.124	1	3.75	5.43	173	192	0.511	94.1	13.2	0.18	10	10.4	11.7	1	97	3.6	25.6	23	36.8	0.98	2.3	0.91	50	58	1	0	1	1	0	0	0	0
62	1	665	1.01	0.51	9.07	4.69	131	261	0.395	84.2	12.5	0.3	11	13.3	10.2	0.87	132	3.22	23.3	29.1	33	0.68	1.16	1.05	43	55	1	1	0	1	0	0	1	0
51	2	219	25.8	66.8	8.89	4.99	153	176	0.452	90.6	13.4	0.2	11	13.9	10	0.85	125	4.47	155.9	28.9	36.7	0.67	1.96	1.54	64	33	1	1	1	1	0	0	1	0
49	1	561	6.24	24.7	5.52	4.55	144	171	0.47	89.5	12.3	0.18	11	11.8	12	1.03	90	3.92	67.7	23.9	44.1	2.03	2.99	1.07	56	47	1	1	1	1	0	0	0	0
41	1	260	7.72	3.05	11.44	4.68	147	319	0.43	93.8	12.5	0.32	10	11.1	10.7	0.91	110	3.73	37.2	39.2	43.9	2.16	3.43	1	50	60	1	1	0	1	1	0	0	1
59	1	10.3	1.72	17.8	5.21	4.65	150	157	0.44	94.6	13.1	0.14	9	9.4	11.6	0.99	96	3.05	35.1	20.4	36.9	1.04	2.43	1.48	46	60	1	1	1	0	0	0	0	0
55	1	6.4	11.8	16	9.6	5.08	156	240	0.45	85.8	12.7	0.23	11	12	10.1	0.86	123	4.47	11.9	22.6	39.5	0.76	2.61	1.14	47	64	1	1	1	0	0	0	0	0
46	1	1100	0.16	0.79	5.73	4.94	143	230	0.43	88.9	12.4	0.24	10.4	11.4	9.4	0.81	141	3.43	63.4	120.7	35.4	2.06	2.12	1.95	50	60	1	1	0	0	0	0	0	0
43	1	5	2.21	10.4	8.41	4.78	148	198	0.449	93.9	12.8	0.2	11	12.6	10.8	0.92	106	2.4	48.6	46.9	39.5	1.16	2.05	1.2	48	62	1	1	1	0	0	0	0	0
58	1	281	1.01	6.41	5.44	4.94	157	250	0.46	93.7	14.1	0.3	12	15.3	10.6	0.91	119	3	21.2	9.4	38.7	2.12	2.31	1.15	50	62	1	1	0	0	0	0	0	0
76	1	75.8	1.1	1.5	6.49	4.76	148	189	0.446	93.7	11.8	0.21	11	14.7	10.8	0.92	106	3.15	22.2	21.5	35.6	1.37	3.66	1.11	44	60	1	1	1	1	0	0	0	0
67	1	72.1	0.12	1.3	6.78	4.7	138	143	0.413	87.9	12.6	0.17	12	15	10.9	0.93	103	2.67	25.5	15.3	37.6	1.57	2.47	1.46	44	60	1	1	0	0	0	0	0	0
57	1	#NULL!	0.206	12.8	11.4	4.46	136	200	0.405	90.8	13.9	0.2	10	10.4	11	0.94	104	3.78	31.5	17.2	35.4	2.44	1.83	1.48	37	53	1	1	0	0	0	0	0	0
46	1	113	0.093	1	8.52	4.38	147	314	0.427	97.5	11.6	0.31	10	11	11.1	0.95	105	2.68	17.2	10.8	33	2.23	1.83	0.94	48	69	1	1	0	0	0	0	0	0
57	1	8.7	2.38	5.2	7.68	4.83	149	270	0.42	87.8	12.8	0.34	13	16.7	11.3	0.97	97	1.56	32.4	16.8	39.4	1.05	1.72	2.21	51	57	1	1	0	0	0	0	0	0
54	1	95.1	2.6	2.9	11.5	4.78	142	288	0.42	88.5	13.1	0.3	10	11.6	11.7	1	93	3.61	49.6	45	39.1	0.69	2.45	1.26	60	32	0	0	0	0	0	0	0	0
64	1	32	1.94	1.5	6.08	4.49	133	151	0.387	86.2	12.9	0.16	11	12.4	20.2	2.58	27	3.23	43.9	21.8	36.9	0.9	2.45	1.78	42	62	1	1	0	1	0	0	0	0
42	1	#NULL!	5.5	7.9	6.81	4.84	146	256	0.42	87.6	12.6	0.3	12	14.6	11.8	1.01	99	3.57	21	9.6	44.1	1.51	1.57	0.64	45	59	0	0	0	0	0	0	0	0
54	1	26.1	0.5	1	9.5	4.87	144	252	0.425	87.3	12.6	0.25	10	11.1	11.8	1.01	93	3.84	24.2	38.6	38.9	1.45	2.4	1.14	47	60	1	1	1	0	0	0	0	0
60	1	50.8	8.6	12.8	7.17	4.23	125	249	0.376	88.9	12.7	0.28	11	14	10.3	0.88	118	3.64	63.3	16.1	39.5	2.36	4.3	1.35	50	57	1	1	0	0	0	0	0	0
67	1	66.8	1.4	3.3	8.29	5.08	159	256	0.483	95.1	12.5	0.27	11	12.6	10.5	0.9	114	2.87	30.8	35.7	46.1	2.19	2.89	0.99	59	61	1	1	1	0	0	0	0	0
64	1	112	0.5	1	7.07	4.83	155	202	0.451	93.4	13.5	0.22	11	13.2	10.3	0.88	115	4.13	19.6	15.5	35.9	1.34	3.09	1.49	55	68	0	1	1	1	0	0	0	1
42	1	636	13.7	18.5	6.36	5	109	137	0.37	74	15.6	0.16	12	16.3	11.3	0.97	99	2.54	86.3	26.6	38.9	1.27	2.15	1.17	67	57	1	1	0	1	0	0	0	0
54	1	46.4	19.3	51.1	9.28	4.97	122	328	0.384	77.3	16.5	0.33	10	11	12.5	1.07	84	2.63	64	14.3	39.2	0.66	3.35	1.73	45	62	1	1	1	0	0	0	0	0
55	1	186	1.01	12.1	8.4	3.94	120	289	0.34	87.3	14	0.31	11	12.5	10.5	0.9	116	2.99	44.7	48.2	36.8	1.95	3.7	1.12	46	58	1	0	0	0	0	0	0	0
62	1	711	1.6	8.6	22.41	4.96	157	353	0.46	94.2	12.8	0.42	12	14.8	10.2	0.87	124	3.11	67.7	46.6	44.8	2.2	3.92	1.53	56	44	1	1	1	0	0	0	0	0
68	1	10	10.4	1	7.95	4.65	156	227	0.47	101	13.8	0.24	11	12.1	10.3	0.88	122	2.78	29.8	27.6	40.9	6.97	2.51	1.24	55	60	1	1	1	0	0	0	0	0
41	1	260	7.72	3.05	11.44	4.68	147	0.32	0.439	93.8	12.5	0.32	10	11.1	10.7	0.91	110	3.73	37.2	39.2	43.9	2.16	3.43	1	50	60	1	1	0	0	0	0	0	0
49	1	24	19	29.8	5.13	4.39	136	114	0.408	92.9	13	0.12	10	12	10.6	0.91	112	2.9	132	82.7	30.8	1.95	2.1	1.4	48	60	1	1	1	1	0	0	1	0
51	1	83.9	0.57	5.9	8.3	5.31	172	195	0.5	94.4	12.6	0.21	11	12.4	9.7	0.83	127	2.22	25.7	22.7	40.5	2.47	2.8	1.43	48	50	1	1	0	0	0	0	0	0
38	1	54.7	11.5	62.6	7.88	4.99	149	169	0.422	84.6	13.4	0.17	10	12.6	12.4	1.06	91	4.32	90.7	27.4	40.4	1.64	1.39	0.96	49	57	1	1	1	0	0	0	0	0
45	1	28.7	3.1	6.8	11.69	4.99	147	284	0.42	84.4	14.1	0.28	10	11.1	10.8	0.93	111	2.3	38	18.6	41.2	1.23	3.74	1.51	46	62	1	1	1	0	0	0	0	0
50	1	45	4.23	7.8	12.61	4.83	151	244	0.443	91.7	13.5	0.22	9	8.8	11	0.94	105	3.18	31.3	11	37	1.11	3.43	0.91	45	55	1	1	0	0	0	0	0	0
55	1	19.7	4.1	36.9	8.73	5.14	151	239	0.441	85.8	13.2	0.25	10.5	12.2	11.3	0.97	102	3.39	#NULL!	#NULL!	#NULL!	#NULL!	#NULL!	#NULL!	50	57	1	1	1	0	0	0	0	0
